# Supplementary material for: Gestational Iron Supplementation Improves Fetal Outcomes in a Rat Model of Prenatal Alcohol Exposure
Source: MDPI journal article supplement (doi:10.3390/nu14081653), 2022-04-15
Supplement: s1 [file s1]

# **Gestational Iron Supplementation Improves Fetal Outcomes in a Rat Model of Prenatal Alcohol Exposure**

Kaylee K. Helfrich <sup>1,2</sup>, Nipun Saini <sup>1,\*</sup>, Sze Ting (Cecilia) Kwan <sup>1</sup>, Olivia C. Rivera <sup>1</sup>, Rachel Hodges <sup>1</sup> and Susan M. Smith <sup>1,2,\*</sup>

**SUPPLEMENTARY MATERIAL**  
Supplementary Tables (Table S1 – Table S5)

**Table S1:** Experimental diet composition

| <b>Ingredient</b>                        | <b>Amount (g/kg diet)</b> |
|------------------------------------------|---------------------------|
| Casein, low Cu & Fe                      | 200.0                     |
| DL-Methionine                            | 3.0                       |
| Sucrose                                  | 549.49                    |
| Corn Starch                              | 150.0                     |
| Corn Oil                                 | 50.0                      |
| Mineral Mix, Fe Deficient <sup>a,*</sup> | 35.0                      |
| Vitamin Mix, AIN-76A <sup>b,*</sup>      | 10.0                      |
| Choline Bitartrate                       | 2.0                       |
| Ethoxyquin, antioxidant                  | 0.01                      |
| Ferrous Sulfate, heptahydrate            | 0.5                       |

TD.130338 (Harlan-Teklad, Madison, WI). Provides 17.8% kcal from protein, 70.4% kcal from carbohydrate, 11.8% kcal from fat, and 4.0 kcal/g.

<sup>a</sup>TD.81062 (Harlan-Teklad, Madison, WI)

<sup>b</sup>TD.40077 (Harlan-Teklad, Madison, WI)

\* American Institute of Nutrition. Report of the American Institute of Nutrition ad hoc committee on standards for nutritional studies. J Nutr 1977;107:1340–48.

**Table S2:** Maternal feces 24-hour mineral content

|            | CON                         | ALC                        | CON + Iron                 | ALC + Iron                  | <i>P</i> value           |       |            |
|------------|-----------------------------|----------------------------|----------------------------|-----------------------------|--------------------------|-------|------------|
|            |                             |                            |                            |                             | ALC                      | Iron  | ALC x Iron |
| Barium     | 0.015 ± 0.011 <sup>ab</sup> | 0.027 ± 0.009 <sup>b</sup> | 0.011 ± 0.007 <sup>a</sup> | 0.023 ± 0.016 <sup>ab</sup> | <b>0.005</b>             | 0.207 | 0.675      |
| Calcium    | 52.01 ± 14.16               | 47.92 ± 22.44              | 59.85 ± 22.93              | 53.86 ± 28.66               | 0.517                    | 0.378 | 0.903      |
| Chromium   | 0.033 ± 0.010               | 0.030 ± 0.016              | 0.046 ± 0.019              | 0.034 ± 0.021               | 0.101                    | 0.341 | 0.538      |
| Copper     | 0.055 ± 0.017               | 0.052 ± 0.032              | 0.091 ± 0.048              | 0.063 ± 0.040               | Overall <i>P</i> = 0.248 |       |            |
| Potassium  | 0.87 ± 0.52 <sup>a</sup>    | 1.95 ± 1.65 <sup>a</sup>   | 1.09 ± 0.70 <sup>a</sup>   | 1.65 ± 1.20 <sup>a</sup>    | <b>0.009</b>             | 0.996 | 0.508      |
| Magnesium  | 2.97 ± 0.83                 | 2.69 ± 1.33                | 3.58 ± 1.34                | 2.91 ± 1.88                 | 0.328                    | 0.391 | 0.688      |
| Manganese  | 0.815 ± 0.248               | 0.778 ± 0.345              | 1.085 ± 0.443              | 0.840 ± 0.466               | Overall <i>P</i> = 0.496 |       |            |
| Phosphorus | 24.28 ± 6.71                | 24.02 ± 11.61              | 30.27 ± 11.65              | 28.77 ± 16.95               | Overall <i>P</i> = 0.707 |       |            |
| Sulfur     | 9.41 ± 2.92                 | 8.84 ± 3.23                | 13.64 ± 6.18               | 10.95 ± 6.27                | 0.228                    | 0.184 | 0.503      |
| Strontium  | 0.020 ± 0.011 <sup>a</sup>  | 0.029 ± 0.006 <sup>a</sup> | 0.019 ± 0.008 <sup>a</sup> | 0.026 ± 0.014 <sup>a</sup>  | <b>0.039</b>             | 0.580 | 0.868      |
| Zinc       | 0.461 ± 0.139               | 0.428 ± 0.194              | 0.647 ± 0.296              | 0.571 ± 0.367               | Overall <i>P</i> = 0.356 |       |            |

All elements are in units of total µg element in 24 hours of feces. Values are means ± SD. Elements are shown here if they were above the detection limit of ICPOES. Means that do not share a common superscript letter differ at *P*<0.05. Significant *P*-values are bolded. ALC, alcohol exposed; CON, control.

**Table S3:** Maternal liver mineral content

|            | CON                     | ALC                     | CON + Iron               | ALC + Iron              | <i>P</i> value   |              |            |
|------------|-------------------------|-------------------------|--------------------------|-------------------------|------------------|--------------|------------|
|            |                         |                         |                          |                         | ALC              | Iron         | ALC x Iron |
| Calcium    | 24.7 ± 2.3              | 27.4 ± 4.9              | 25.3 ± 5.0               | 26.5 ± 4.1              | 0.200            | 0.913        | 0.608      |
| Copper     | 3.4 ± 0.2 <sup>a</sup>  | 2.8 ± 0.2 <sup>b</sup>  | 3.1 ± 0.3 <sup>ab</sup>  | 2.7 ± 0.2 <sup>b</sup>  | <b>&lt;0.001</b> | 0.084        | 0.277      |
| Potassium  | 3308 ± 141              | 3258 ± 188              | 3238 ± 299               | 3264 ± 145              | 0.869            | 0.647        | 0.588      |
| Magnesium  | 210 ± 8                 | 201 ± 15                | 203 ± 19                 | 197 ± 8                 | 0.116            | 0.205        | 0.710      |
| Manganese  | 2.3 ± 0.1               | 2.3 ± 0.3               | 2.2 ± 0.3                | 2.3 ± 0.2               | 0.476            | 0.308        | 0.750      |
| Sodium     | 748 ± 85                | 695 ± 77                | 718 ± 85                 | 747 ± 108               | 0.694            | 0.735        | 0.189      |
| Phosphorus | 3157 ± 116 <sup>a</sup> | 2896 ± 183 <sup>b</sup> | 3005 ± 324 <sup>ab</sup> | 2895 ± 99 <sup>b</sup>  | <b>0.011</b>     | 0.272        | 0.273      |
| Sulfur     | 5741 ± 195 <sup>a</sup> | 5226 ± 350 <sup>b</sup> | 5325 ± 516 <sup>ab</sup> | 5095 ± 182 <sup>b</sup> | <b>0.003</b>     | <b>0.024</b> | 0.227      |
| Zinc       | 22.6 ± 0.45             | 21.5 ± 2.1              | 20.7 ± 1.9               | 21.4 ± 1.5              | 0.715            | 0.072        | 0.116      |

All elements are in units of µg element/g wet weight liver. Values are means ± SD. Elements are shown here if they were above the detection limit of ICPOES. Means that do not share a common superscript letter differ at P<0.05. Significant *P*-values are bolded.

ALC, alcohol exposed; CON, control.

**Table S4:** Fetal liver mineral content

|           | CON                      | ALC                      | CON + Iron               | ALC + Iron               | <i>P</i> value   |              |            |
|-----------|--------------------------|--------------------------|--------------------------|--------------------------|------------------|--------------|------------|
|           |                          |                          |                          |                          | ALC              | Iron         | ALC x Iron |
| Calcium   | 44 ± 5                   | 44 ± 5                   | 44 ± 4                   | 46 ± 5                   | 0.385            | 0.955        | 0.887      |
| Copper    | 8.5 ± 2.3                | 9.4 ± 2.8                | 9.6 ± 2.7                | 9.0 ± 3.5                | 0.600            | 0.703        | 0.111      |
| Magnesium | 153 ± 9 <sup>ab</sup>    | 158 ± 8 <sup>a</sup>     | 149 ± 9 <sup>b</sup>     | 158 ± 8 <sup>ab</sup>    | <b>0.009</b>     | 0.356        | 0.975      |
| Manganese | 0.27 ± 0.05 <sup>a</sup> | 0.38 ± 0.13 <sup>b</sup> | 0.25 ± 0.04 <sup>a</sup> | 0.30 ± 0.06 <sup>a</sup> | <b>&lt;0.001</b> | <b>0.007</b> | 0.156      |
| Sodium    | 883 ± 116                | 926 ± 122                | 919 ± 93                 | 894 ± 87                 | 0.775            | 0.961        | 0.301      |
| Zinc      | 44 ± 5                   | 50 ± 11                  | 45 ± 6                   | 45 ± 5                   | 0.192            | 0.352        | 0.137      |

All elements are in units of µg element/g wet weight liver. Values are means ± SD. Elements are shown here if they were above the detection limit of ICPOES. Data from males and females were combined since there was no effect of sex on mineral content. Means that do not share a common superscript letter differ at  $P < 0.05$ . Significant *P*-values are bolded. ALC, alcohol exposed; CON, control.

**Table S5:** Fetal brain mineral content

|           | CON                      | ALC                      | CON + Iron                | ALC + Iron               | <i>P</i> value   |              |            |
|-----------|--------------------------|--------------------------|---------------------------|--------------------------|------------------|--------------|------------|
|           |                          |                          |                           |                          | ALC              | Iron         | ALC x Iron |
| Calcium   | 52 ± 4                   | 50 ± 2                   | 52 ± 3                    | 51 ± 3                   | 0.080            | 0.260        | 0.656      |
| Copper    | 0.42 ± 0.04 <sup>a</sup> | 0.49 ± 0.06 <sup>b</sup> | 0.45 ± 0.05 <sup>ab</sup> | 0.48 ± 0.08 <sup>b</sup> | <b>&lt;0.001</b> | 0.491        | 0.139      |
| Magnesium | 149 ± 5                  | 149 ± 6                  | 148 ± 6                   | 153 ± 8                  | 0.176            | 0.458        | 0.171      |
| Manganese | 0.20 ± 0.02 <sup>a</sup> | 0.25 ± 0.04 <sup>b</sup> | 0.19 ± 0.02 <sup>a</sup>  | 0.23 ± 0.03 <sup>b</sup> | <b>&lt;0.001</b> | <b>0.016</b> | 0.325      |
| Sodium    | 1172 ± 38                | 1176 ± 42                | 1205 ± 71                 | 1197 ± 59                | 0.908            | 0.050        | 0.665      |
| Zinc      | 9.4 ± 0.5                | 9.3 ± 0.5                | 9.2 ± 0.4                 | 9.5 ± 0.6                | 0.256            | 0.883        | 0.175      |

All elements are in units of µg element/g wet weight brain. Values are means ± SD. Elements are shown here if they were above the detection limit of ICPOES. Data from males and females were combined since there was no effect of sex on mineral content. Means that do not share a common superscript letter differ at  $P < 0.05$ . Significant *P*-values are bolded. ALC, alcohol exposed; CON, control.
